# Supplementary material
Source: publisher figshare collection journal article supplement (https://acs.figshare.com/ndownloader/files/5825349)

## “Triangular Nanoframes Made of Gold and Silver”

Gabriella S. Métraux, Yunwei Charles Cao, Rongchao Jin, Chad A. Mirkin

### Supporting Information:

**Figure 1.** Silver prisms with  $\text{H}_2\text{PtCl}_6$  (Pt:Ag = 1:4). The face-selective etching process observed in the case of  $\text{HAuCl}_4$  does not appear to take place with  $\text{H}_2\text{PtCl}_6$ .

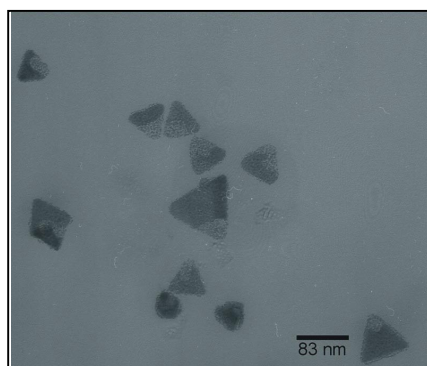

**Figure 2.** TEM-EDX spectra of nanoframe colloid after (A) one cycle of  $\text{HAuCl}_4$ /L-ascorbic acid and (B) three cycles of  $\text{HAuCl}_4$ /L-ascorbic acid.

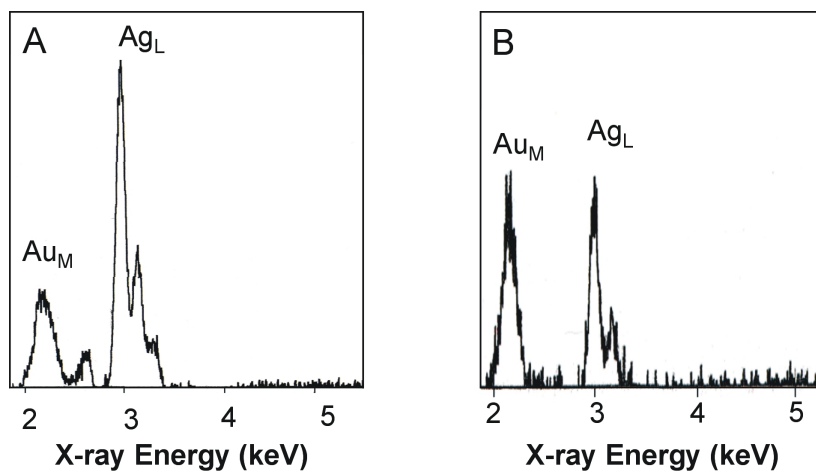

Supplement: Supplementary file 1 [file 5825349]
